# Supplementary material
Source: HighWire-hosted journal article supplement (https://cmaj.ca/highwire/filestream/59378/field_highwire_adjunct_files/1/150003-res-2-at.pdf)
Supplement: 150003-res-2-at.pdf [file 150003-res-2-at.pdf]

**Appendix 2 (as supplied by the authors): CCI Codes for Breast Surgery Related Interventions and OHIP Codes for Metastatic Imaging**

| Part 1. Canadian Classification of Health Interventions (CCI) codes for breast related interventions |          |
|------------------------------------------------------------------------------------------------------|----------|
| Breast Procedure                                                                                     | CCI code |
| Mastectomy                                                                                           |          |
| Excision total, breast                                                                               | 1YM89    |
| Excision total with reconstruction, breast                                                           | 1YM90    |
| Excision radical, breast                                                                             | 1YM91    |
| Excision radical with reconstruction, breast                                                         | 1YM92    |
| Breast Conserving Surgery                                                                            |          |
| Excision partial, breast                                                                             | 1YM87    |
| Excision partial with reconstruction, breast                                                         | 1YM88    |
| Axillary lymph node dissection                                                                       |          |
| Partial (subtotal)                                                                                   | 1MD87    |
| Radical/total (all nodes plus surrounding tissue)                                                    | 1MD89    |
| Axillary lymph node biopsy                                                                           |          |
| Biopsy, axillary lymph nodes using percutaneous (needle) approach                                    | 2MD71HA  |
| Biopsy, axillary lymph nodes using open approach                                                     | 2MD71LA  |

| Part 2. Ontario Health Insurance Plan (OHIP) fee codes for identifying metastatic imaging |                            |                                                              |
|-------------------------------------------------------------------------------------------|----------------------------|--------------------------------------------------------------|
| OHIP fee code                                                                             | Body Site_Imaging Modality | Description                                                  |
| J105                                                                                      | OTHER_US                   | DIAG.ULTRA-HEAD&NECK-ECHOGRAPHY-FACE &/OR NECK-A/B SCAN.     |
| J128                                                                                      | ABDOMEN_US                 | DIAG. ULTRASOUND-ABDOMEN-ABDOMINAL SCAN -LIMITED STUDY.      |
| J135                                                                                      | ABDOMEN_US                 | DIAG.ULTRASOUND ABD./RETROPERIT-ABDOMIN.SCAN COMPLETE        |
| J138                                                                                      | PELVIS_US                  | D&T ULTRASOUND-INTRACAVITY ULTRASOUND(TRANSRECTAL/VAG)       |
| J161                                                                                      | PELVIS_US                  | INTRACAVITARY US LTD FOR OTHER THAN PREG                     |
| J162                                                                                      | PELVIS_US                  | D&T,ULTRASOUND-PELVIC COMP.                                  |
| J163                                                                                      | PELVIS_US                  | PELVIS, LIMITED STUDY OTHER THAN PREGNANCY                   |
| J405                                                                                      | OTHER_US                   | D&T,ULTRA SOUND-ECHOGRAPHY P2-FACE &/NECK, EXC'L VAS.STUDY   |
| J428                                                                                      | ABDOMEN_US                 | D&T,ULTRA SOUND-ABD.& RETROPERIT.P2-ABD.SCAN LIMITED STUDY   |
| J435                                                                                      | ABDOMEN_US                 | D&T,ULTRA SOUND ABD.& RETROPERIT.P2-ABD.SCAN COMPLETE        |
| J438                                                                                      | PELVIS_US                  | D&T,ULTRA SOUND-PELVIS-P2 INTRACAVITY U.S.(TRANSRECT/VAG)1PE |
| J461                                                                                      | PELVIS_US                  | INTRACAVITARY US LTD FOR OTHER THAN PREG                     |

Appendix to: Simos D, Catley C, van Walraven C, et al. Imaging for distant metastases in women with early-stage breast cancer: a population-based cohort study. *CMAJ* 2015. DOI: 10.1503/cmaj.150003.

Copyright © 2015 The Author(s) or their employer(s).

To receive this resource in an accessible format, please contact us at [cmajgroup@cmaj.ca](mailto:cmajgroup@cmaj.ca)

|      |                   |                                                              |
|------|-------------------|--------------------------------------------------------------|
| J462 | PELVIS_US         | DIAG.ULTRA SOUND-PELVIS-P2,COMPLETE 1 PER CYCLE *            |
| J463 | PELVIS_US         | PELVIS, LIMITED STUDY OTHER THAN PREGNANCY                   |
| J650 | SKELETON_BONESCAN | NUCLEAR MED.WHOLE BODY SURVEY M.SK.                          |
| J651 | SKELETON_BONESCAN | NUCLEAR MED.SPEC.SITE-ONE OR MORE M.SK                       |
| J700 | WHOLE_BODY_PET    | PET SCAN - SOLITARY PULMONARY NODULE (SPN)                   |
| J706 | WHOLE_BODY_PET    | PET SCAN - NON-SMALL CELL LUNG CANCER (NSCLC)                |
| J819 | SKELETON_BONESCAN | SPECT - PERMIT UP TO THREE CLAIMS WITH GALLIUM SCANS         |
| J850 | SKELETON_BONESCAN | NUCLEAR MED.CORRES.TO J650                                   |
| J851 | SKELETON_BONESCAN | NUCLEAR MED.CORRES.TO J651                                   |
| J852 | SKELETON_BONESCAN | NUCLEAR MED.CORRES.TO J652                                   |
| J853 | SKELETON_BONESCAN | NUCLEAR MED.CORRES.TO J653                                   |
| X001 | SKELETON_XRAY     | DIAGNOSTIC RADIOLOGY-SKULL-ROUTINE-FOUR VIEWS                |
| X004 | SKELETON_XRAY     | DIAGNOSTIC RADIOLOGY-FACIAL BONES-MINIMUM THREE VIEWS        |
| X006 | SKELETON_XRAY     | DIAGNOSTIC RADIOLOGY-MANDIBLE-MINIMUM THREE VIEWS            |
| X007 | SKELETON_XRAY     | DIAGNOSTIC RADIOLOGY-TEMPOROMANDIBULAR JOINTS-MIN. 4 VIEWS   |
| X009 | SKELETON_XRAY     | DIAGNOSTIC RADIOLOGY-SKULL-FIVE OR MORE VIEWS                |
| X012 | SKELETON_XRAY     | DIAGNOSTIC RADIOLOGY-MANDIBLE-FOUR OR MORE VIEWS             |
| X025 | SKELETON_XRAY     | DIAGNOSTIC RADIOLOGY-CERVICAL SPINE TWO OR THREE VIEWS       |
| X027 | SKELETON_XRAY     | DIAGNOS.RADIOLOGY.THORACIC SPINE TWO VIEWS                   |
| X028 | SKELETON_XRAY     | DIAGNOSTIC RADIOLOGY-LUMBAR/LUMBOSACRAL SPINE-2/3 VIEWS      |
| X031 | SKELETON_XRAY     | DIAGNOSTIC RADIOLOGY-SPINE-ORTHOENOTGENOGR 2 OR MORE VIEWS   |
| X034 | SKELETON_XRAY     | DIAGNOS.RADIOLOGY SACRUM/COCCYX.TWO VIEWS                    |
| X035 | SKELETON_XRAY     | DIAGNOSTIC RADIOLOGY-SACRO-ILIAC JOINTS-TWO/THREE VIEWS      |
| X036 | SKELETON_XRAY     | DIAGNOSTIC RADIOLOGY-PELVIS &/OR HIP-SINGLE VIEW.            |
| X037 | SKELETON_XRAY     | DIAGNOSTIC RADIOLOGY-PELVIS &/OR HIP-2 VIEWS.                |
| X038 | SKELETON_XRAY     | DIAGNOSTIC RADIOLOGY-PELVIS & SACRO-ILIAC JOINT-3/MORE VIEWS |
| X039 | SKELETON_XRAY     | DIAGNOSTIC RADIOLOGY-RIBS-2 OR MORE VIEWS.                   |
| X040 | SKELETON_XRAY     | DIAGNOSTIC RADIOLOGY-STERNUM-MINIMUM-TWO VIEWS               |
| X045 | SKELETON_XRAY     | DIAGNOS.RADIOLOGY.CLAVICLE.TWO VIEWS                         |
| X046 | SKELETON_XRAY     | DIAGNOSTIC RADIOLOGY-ACROMIOCLAVICULAR BIL. TWO VIEWS        |
| X047 | SKELETON_XRAY     | DIAGNOSTIC RADIOLOGY-STERNOCLAVICULAR JOINTS-BIL-2 OR 3 VIEW |
| X048 | SKELETON_XRAY     | DIAGNOS RADIOLOGY SHOULDER TWO VIEWS                         |
| X049 | SKELETON_XRAY     | DIAGNOS.RADIOLOGY SCAPULA TWO VIEWS                          |
| X050 | SKELETON_XRAY     | DIAGNOSTIC RADIOLOGY-HUMERUS-INCL. 1 JOINT-2 VIEWS.          |
| X051 | SKELETON_XRAY     | DIAGNOS.RADIOLOGY ELBOW TWO VIEWS                            |
| X053 | SKELETON_XRAY     | DIAGNOSTIC RADIOLOGY-WRIST-2/3 VIEWS.                        |
| X060 | SKELETON_XRAY     | DIAGNOS.RADIOLOGY.HIP(UNIL.)TWO OR MORE VIEWS                |
| X063 | SKELETON_XRAY     | DIAGNOS.RADIOLOGY.FEMUR INCL.ONE JOINT.TWO VIEWS             |
| X064 | SKELETON_XRAY     | DIAGNOSTIC RADIOLOGY-LEG LENGTH STUDIES-ORTHOENOTGENOGRAM    |
| X065 | SKELETON_XRAY     | DIAGNOS.RADIOLOGY.KNEE(INCL.PATELLA)TWO VIEWS                |
| X066 | SKELETON_XRAY     | DIAGNOS.RADIOLOGY.TIBIA&FIBULA INCL.ONE JOINT.TWO VIEWS      |

|      |               |                                                               |
|------|---------------|---------------------------------------------------------------|
| X069 | SKELETON_XRAY | DIAGNOSTIC RADIOLOGY-FOOT-2/3 VIEWS.                          |
| X080 | SKELETON_XRAY | DIAGNOSTIC RADIOLOGY-SURVEY STUDY-OTHER-BASIC.                |
| X081 | SKELETON_XRAY | DIAGNOSTIC RADIOLOGY-SURVEY STUDY-OTHER-PLUS PER FILM/VIEW.   |
| X090 | CHEST_XRAY    | DIAGNOSTIC RADIOLOGY CHEST SINGLE VIEW                        |
| X091 | CHEST_XRAY    | DIAGNOSTIC RADIOLOGY CHEST 2 VIEWS                            |
| X092 | CHEST_XRAY    | DIAGNOSTIC RADIOLOGY CHEST 3 OR MORE VIEWS                    |
| X124 | OTHER_CT      | DIAGNOSTIC RADIOLOGY-NECK-WITH AND WITHOUT I.V.CONTRAST-C.T.T |
| X125 | CHEST_CT      | DIAGNOSTIC RADIOLOGY-THORAX-WITH AND WITHOUT I.V. CONT-C.T.T  |
| X126 | ABDOMEN_CT    | DIAGNOSTIC RADIOLOGY-ABDOMEN-WITH /OUT I.V. CONTRAST C.T.T.   |
| X127 | SKELETON_CT   | DIAGNOSTIC RADIOLOGY-EXTREM. WITH/OUT.I.V.CONTRAST.C.T.T      |
| X128 | SKELETON_CT   | DIAG.RADIOLOGY-COMPUTED TOMOGRAPHY-SPINE-W&OUT I.V.CONTRAST   |
| X188 | BRAIN_CT      | DIAGNOSTIC RADIOLOGY-HEAD-WITH/WITHOUT I.V.CONTRAST C.T.T.    |
| X202 | SKELETON_XRAY | DIAGNOSTIC RADIOLOGY-CERVICAL SPINE-FOUR/FIVE VIEWS           |
| X203 | SKELETON_XRAY | DIAGNOSTIC RADIOLOGY-CERVICAL SPINE-SIX OR MORE VIEWS         |
| X204 | SKELETON_XRAY | DIAGNOSTIC RADIOLOGY-THORACIC SPINE-THREE OR MORE VIEWS       |
| X205 | SKELETON_XRAY | DIAG.RADIOLOGY LUMBAR/LUMBOSACRAL SPINE 4/5 VIEWS             |
| X206 | SKELETON_XRAY | DIAG.RADIOLOGY LUMBAR/LUMBOSACRAL SPINE 6 OR MORE VIEWS       |
| X207 | SKELETON_XRAY | DIAGNOSTIC RADIOLOGY-SACRUM/COCCYX-THREE OR MORE VIEWS        |
| X208 | SKELETON_XRAY | DIAGNOSTIC RADIOLOGY-SACRO-ILIAC JOINTS-4/MORE VIEWS.         |
| X210 | SKELETON_XRAY | DIAGNOSTIC RADIOLOGY-ACROMIOCLAV. JOINTS-BIL-3 OR MORE VIEWS  |
| X211 | SKELETON_XRAY | DIAGNOSTIC RADIOLOGY-STERNOCLAV. JOINTS-BIL.-4 OR MORE VIEWS  |
| X212 | SKELETON_XRAY | DIAGNOSTIC RADIOLOGY-SHOULDER-THREE OR MORE VIEWS             |
| X214 | SKELETON_XRAY | DIAGNOSTIC RADIOLOGY-HUMERUS-INCL. 1 JOINT-3 OR MORE VIEWS.   |
| X215 | SKELETON_XRAY | DIAGNOSTIC RADIOLOGY-ELBOW-THREE/FOUR VIEWS                   |
| X223 | SKELETON_XRAY | DIAGNOSTIC RADIOLOGY-FEMUR- INCL. 1 JOINT- 3 OR MORE VIEWS.   |
| X224 | SKELETON_XRAY | DIAGNOSTIC RADIOLOGY-KNEE & PATELLA-THREE OR FOUR VIEWS       |
| X225 | SKELETON_XRAY | DIAGNOSTIC RADIOLOGY-KNEE & PATELLA-FIVE OR MORE VIEWS        |
| X226 | SKELETON_XRAY | DIAGNOSTIC RADIOLOGY-TIBIA & FIBULA-INC 1JT.-3/MORE VIEWS.    |
| X231 | SKELETON_XRAY | DIAG.RAD.-X-RAY-PELVIS WITH I.V.CONTRAST                      |
| X232 | PELVIS_CT     | DIAG.RAD.-PELVIS WITH I.V. CONTRAST                           |
| X233 | PELVIS_CT     | DIAG RAD.-X-RAY PELVIS WITH/OUT I.V. CONTRAST                 |
| X400 | BRAIN_CT      | DIAG.RADIOLOGY-COMPUTED TOMOGRAHMY-HEAD-WITHOUT I.V.CONTRAST  |
| X401 | BRAIN_CT      | DIAG.RADIOLOGY-COMPUTED TOMOGRAPHY-HEAD-WITH I.V.CONTRAST     |
| X402 | BRAIN_CT      | DIAG.RAD.COMPUTED TOMOGRAPHY COMPLEX HEAD WITHOUT IV CONTRAS  |
| X403 | OTHER_CT      | DIAG RADIOLOGY-COMPUTED TOMOGRAPHY-NECK-WITHOUT               |

|      |               |                                                              |
|------|---------------|--------------------------------------------------------------|
|      |               | I.V.CONTRAST                                                 |
| X404 | OTHER_XRAY    | DIAG.RADIOLOGY-COMPUTED TOMOGRAPHY-NECK WITH I.V.CONTRAST    |
| X405 | BRAIN_CT      | DIAG.RAD.COMPUTED TOMOGRAPHY COMPLEX HEAD &IV CONTRAST       |
| X406 | CHEST_CT      | DIAG. RADIOLOGY-COMPUTED TOMOGRAPHY-THORAX-WITHOUT I.V.CONTR |
| X407 | CHEST_CT      | DIAG. RADIOLOGY-COMPUTED TOMOGRAPHY-THORAX-WITH I.V.CONTR.   |
| X408 | BRAIN_CT      | DIAG.RAD.COMPUT.TOMOGRAPH COMPLEX HEAD WITH/OUT CONTRAST     |
| X409 | ABDOMEN_CT    | DIAG. RADIOLOGY-COMPUTED TOMOGRAPHY-ABDOMEN-W'OUT I.V.CONTR. |
| X410 | ABDOMEN_CT    | DIAG. RADIOLOGY-COMPUTED TOMOGRAPHY-ABDOMEN-WITH I.V.CONTR.  |
| X412 | SKELETON_CT   | DIAG. RADIOLOGY-COMPUTED TOMOGRAPHY-EXTREMITIES-W'OUT IV CON |
| X413 | SKELETON_CT   | DIAG. RADIOLOGY-COMPUTED TOMOGRAPHY-EXTREMITIES-WITH IV.CONT |
| X415 | SKELETON_XRAY | DIAG. RADIOLOGY-COMPUTED TOMOGRAPHY-SPINE-WITHOUT I.V.CONTR. |
| X416 | SKELETON_CT   | DIAG. RADIOLOGY-COMPUTED TOMOGRAPHY-SPINE-WITH I.V.CONTR.    |
| X417 | SKELETON_CT   | THREE DIMENSIONAL CT ACQUISITION SEQUENCING                  |
| X421 | BRAIN_MRI     | DIAG.RAD.MAGNETIC RESONANCE IMAGING HEAD MULTISLICE S.E1-2EC |
| X425 | BRAIN_MRI     | MAGNET.RESONANCE IMAG.HEAD REPEAT(ANOTHER PLANE.DIFF.PULSE)  |
| X431 | OTHER_MRI     | MAGNET.RESONANCE IMAG.NECK MULTISLICE S.E(10R2ECHOS)         |
| X435 | OTHER_MRI     | MAGNET.RESONANCE IMAG.NECK.REP.(ANOTHER PLANE DIFF.PULSE)    |
| X451 | ABDOMEN_MRI   | DIAG.RAD.MAGNET.RESONAN.IMAG.ABDOMEN MULTISLICE S.E(1-2ECHOS |
| X455 | ABDOMEN_MRI   | DIAG.RAD.MAGNET.RESONAN.IMAG.ABDOMEN REPEAT MAX.2            |
| X461 | PELVIS_MRI    | DIAG.RAD.MAGNET.RESONAN.IMAG.PELVIS MULTISLICE S.E(1-2ECHOS) |
| X465 | PELVIS_MRI    | DIAG.RAD.MAGNET.RESONAN.IMAG.PELVIS REPEAT MAX.2             |
| X471 | SKELETON_MRI  | DIAG.RAD.MAGNET.RESONAN.IMAG.EXTREMITIES MULTISLICE S.E(1-2E |
| X475 | SKELETON_MRI  | DIAG.RAD.MAGNET.RESONAN IMAG.EXTREMITIES REPEAT MAX.2        |
| X487 | SKELETON_MRI  | WHEN GADOLINIUM IS USED, ..... ADD                           |
| X488 | SKELETON_MRI  | IMAGING 2 OR MORE JOINTS-ONE SIT MULTISLICE SEQUENCE         |
| X489 | SKELETON_MRI  | IMAGING 2 OR MORE JOINTS MULTISLICE SEQUENCE-REPEAT          |
| X490 | SKELETON_MRI  | MAGNET.RESONANCE IMAG.LTD.SPINE ONE SEGMENT MULTISLICE SE    |
| X492 | SKELETON_XRAY | MAGNET.RESONANCE IMAG.LTD.SPINE ONE SEGMENT REPEAT           |
| X493 | SKELETON_XRAY | MAGNET.RESONANCE IMAG.INTERMEDIATE SPINE(2ADJ.SEG)MULTISL.SE |

|      |              |                                                               |
|------|--------------|---------------------------------------------------------------|
| X495 | SKELETON_MRI | MAGNET.RESONANCE IMAG.INTERMEDIATE<br>SPINE(2ADJ.SEG)REPEAT   |
| X496 | SKELETON_MRI | MAGNET.RESONANCE IMAG.COMPLEX SPINE(2OR<br>MORENONADJ.SEGS)SE |
| X498 | SKELETON_MRI | MAGNET.RESONANCE IMAG COMPLEX SPINE(2OR MORE<br>NONADJSEG)REP |
| X499 | SKELETON_MRI | THREE DIMENSIONAL MRI ACQUISITION SEQUENCE                    |

---
